# Supplementary material for: Photoelectrochemical UV Detector Based on High-Temperature Resistant ITO Nanowire Network Transparent Conductive Electrodes: Both the Response Range and Responsivity Are Improved
Source: MDPI journal article supplement (doi:10.3390/nano13142086), 2023-07-17
Supplement: s1 [file s1]

# Photoelectrochemical UV detector based on high temperature resistant ITO nano networks transparent conductive electrode: both the response range and responsivity are improved

Ying Xiang <sup>1, #</sup>, Baoping Li <sup>2, #</sup>, Yitao Fan <sup>1</sup>, Miaomiao Zhang <sup>2</sup>, Wenxuan Wu <sup>2</sup>, Ze Wang <sup>2</sup>, Minghui Liu <sup>3</sup>, Hu Qiao <sup>3</sup> and Youqing Wang <sup>2, \*</sup>

<sup>1</sup> College of Mechanical and Electrical Engineering, Shaanxi University of Science and Technology, Xi'an 710021, China

<sup>2</sup> The Youth Innovation Team of Shaanxi Universities, Shaanxi University of Science and Technology, Xi'an 710021, China

<sup>3</sup> School of Mechatronic Engineering, Xi'an Technological University, Xi'an 710021, China

# These authors contributed equally to this work

\* Corresponding authors. E-mail address: wangyouqing@sust.edu.cn

## Supplementary Materials

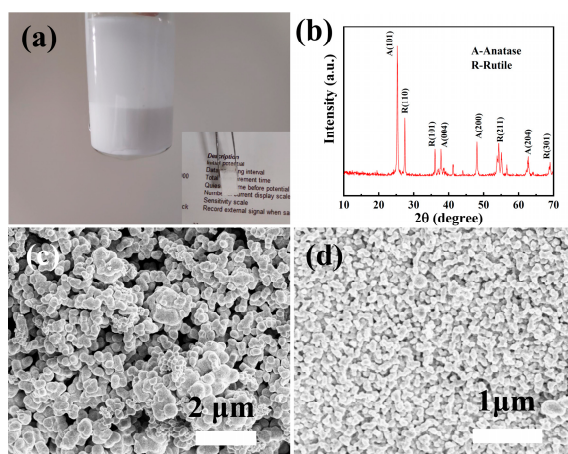

**Figure S1.** The photoactive layer prepared by low temperature method. (a) Physical image of the solution containing TiO<sub>2</sub> nanoparticles; (b) XRD curve of the TiO<sub>2</sub> photoactive layer; (c, d) SEM images of TiO<sub>2</sub> photoactive layers with different magnification.
